# Supplementary material for: Discussion about different cut-off values of conventional hamstring-to-quadriceps ratio used in hamstring injury prediction among professional male football players
Source: PubMed Central journal article supplement (PMC5720729; doi:10.1371/journal.pone.0188974), 2017-12-07

Małgorzata Zgrych  
 Certified translator/interpreter of the English language  
 ul. Niemcewicza 16g/10, 71-520 Szczecin  
 Phone: 501 312 004  
 Email: [malgorzata.zgrych@dobretlumaczenia.eu](mailto:malgorzata.zgrych@dobretlumaczenia.eu)

**CERTIFIED TRANSLATION FROM POLISH**

[the document consist of one page]

[in the upper left-hand corner, the official logo of the Poznań University of Medical Sciences]

THE KAROL MARCINKOWSKI POZNAŃ UNIVERSITY OF MEDICAL SCIENCES-/-  
 BIOETHICS COMMITTEE OF THE KAROL MARCINKOWSKI POZNAŃ UNIVERSITY  
 OF MEDICAL SCIENCES-/-

|                 |                                                                          |
|-----------------|--------------------------------------------------------------------------|
| Collegium Maius | Phone: (+48 61) 854 62 51-/-                                             |
| ul. Fredry 10   | Fax: (+48 61) 854 61 07-/-                                               |
| 61-701 Poznań   | <a href="http://www.bioetyka.ump.edu.pl">www.bioetyka.ump.edu.pl</a> -/- |

KB no. 1238/16-/-

**STATEMENT**-/-

The scientific research entitled “*A retrospective analysis of interdependencies between the functional and biomechanical evaluation of athletes and lower limb injuries in a group of professional footballers*”-/-

conducted by **Ms Monika Grygorowicz, PhD in Physical Culture**-/-

does not have the characteristics of a medical experiment and, according to the Polish law and the Good Clinical Practice, does not require review by the Bioethics Committee.-/-

Poznań, **1 December 2016**-/-

*Committee Chair*-/-  
*[handwritten signature]*

Professor Paweł Chęciński, MD, PhD

XXXXXXXXXXXXXXXXXXXXXXXXXXXXXXXXXXXXXXXXXXXXXXXXXXXXXXXXXXXXXXXXXXXXXXXXXXXX

I, Małgorzata Zgrych, sworn translator of the English language, entered into the list of sworn translators kept by the Polish Minister of Justice under entry no. TP/45/14, hereby attest that the above is a true and complete translation of the scanned original document in Polish presented to me.

Register 22/2017  
 Szczecin, 1 March 2017

*małgorzata zgrych*



Supplement: pone.0188974.s001.pdf [file pone.0188974.s001.pdf]
